# Supplementary material for: Whole almond consumption is associated with better diet quality and cardiovascular disease risk factors in the UK adult population: National Diet and Nutrition Survey (NDNS) 2008–2017
Source: Springer Nature journal article supplement (doi:10.1007/s00394-020-02270-9), 2020-05-16
Supplement: MOESM1 [file 17988754]

**Whole almond consumption is associated with better diet quality and intermediary cardiovascular disease risk factors in the UK adult population: National Diet and Nutrition Survey (NDNS) 2008-2017**

**Vita Dikariyanto\*, Sarah E. E. Berry, Lucy Francis, Leanne Smith, Wendy L. Hall\***

Diet and Cardiometabolic Health Research Group, Department of Nutritional Sciences, Faculty of Life Sciences and Medicine, King's College London, London SE1 9NH, UK.

\*Correspondence: vita.dikariyanto@kcl.ac.uk, wendy.hall@kcl.ac.uk; Tel.: +44 020 78484301/+44 020 78484197

**Supplement**

**Appendix A: Market analysis of almond snacks**

Table 1. Whole almond kernel portion in mixed nut or mixed nut and fruit products in the UK supermarkets

| Type                        | Supermarket name       | Total weight of the product | Total weight of whole almond kernels | % of whole almond kernels in the product | Mean value of % whole almond kernels |
|-----------------------------|------------------------|-----------------------------|--------------------------------------|------------------------------------------|--------------------------------------|
| Mixed roasted unsalted nuts | Waitrose               | 50.1                        | 9.7                                  | 19.4                                     | 28.5                                 |
|                             | M&S                    | 173.9                       | 41.7                                 | 24.0                                     |                                      |
|                             | Co-op                  | 30.5                        | 7.4                                  | 24.3                                     |                                      |
|                             | Sainsbury's            | 203.0                       | 48.8                                 | 24.0                                     |                                      |
|                             | Tesco                  | 201.0                       | 56.6                                 | 28.2                                     |                                      |
|                             | Asda                   | 201.0                       | 102.2                                | 50.8                                     |                                      |
|                             | Morrisons              | 224.9                       | 80.2                                 | 35.7                                     |                                      |
|                             | Lidl                   | 200.7                       | 42.8                                 | 21.3                                     |                                      |
| Mixed roasted salted nuts   | Waitrose               | 175.1                       | 54.4                                 | 31.1                                     | 30.5                                 |
|                             | M&S                    | 177.0                       | 46.0                                 | 26.0                                     |                                      |
|                             | Sainsbury's            | 201.2                       | 59.3                                 | 29.5                                     |                                      |
|                             | Tesco                  | 203.1                       | 72.3                                 | 35.6                                     |                                      |
| Mixed nuts and fruits       | Sainsbury's, Product 1 | 201.6                       | 13.7                                 | 6.8                                      | 18.0                                 |
|                             | Sainsbury's, Product 2 | 200.0                       | 25.3                                 | 12.7                                     |                                      |
|                             | Tesco                  | 251.5                       | 25.4                                 | 10.1                                     |                                      |
|                             | Asda, Product 1        | 250.0                       | 45.7                                 | 18.3                                     |                                      |
|                             | Asda, Product 2        | 200.0                       | 62.6                                 | 31.3                                     |                                      |
|                             | Morrisons              | 200.3                       | 35.3                                 | 17.6                                     |                                      |
|                             | Lidl                   | 200.3                       | 58.3                                 | 29.1                                     |                                      |

## Appendix B: Diet quality scores

Table 1. Original and modified Mediterranean Diet Score (MDS) and its scoring system [30]

| Food group                             |                                        | Scoring*                                |             |
|----------------------------------------|----------------------------------------|-----------------------------------------|-------------|
| Original MDS                           | Modified MDS                           |                                         |             |
| Cereals                                | Cereals                                | >median                                 | 1 (else: 0) |
| Vegetables                             | Vegetables                             | >median                                 | 1 (else: 0) |
| <b>Fruits and Nuts</b>                 | <b>Fruits</b>                          | >median                                 | 1 (else: 0) |
| Legumes                                | Legumes                                | >median                                 | 1 (else: 0) |
| Fish                                   | Fish                                   | >median                                 | 1 (else: 0) |
| Meat                                   | Meat                                   | <median                                 | 1 (else: 0) |
| Dairy products                         | Dairy products                         | <median                                 | 1 (else: 0) |
| Ratio of unsaturated to saturated fats | Ratio of unsaturated to saturated fats | >median                                 | 1 (else: 0) |
| Alcohol                                | Alcohol                                | 10-50 g/d for men<br>5-25 g/d for women | 1 (else: 0) |

\*Except alcohol, scoring of each food group is based on population and sex-specific median.

Table 2. Original and modified Healthy Diet Score (HDS) and the cut-off values for scoring [31]

| HDS                                                     |                |            | HDS – modified based on current UK recommendations     |                     |            |
|---------------------------------------------------------|----------------|------------|--------------------------------------------------------|---------------------|------------|
| Index item                                              | Cut-off values |            | Index item                                             | Cut-off values      |            |
|                                                         | Score 1        | Score 0    |                                                        | Score 1             | Score 0    |
| Saturated fatty acids (% energy intake)                 | 0-10           | >10        | Saturated fatty acids (% energy intake)                | 0-11 <sub>a</sub>   | >11        |
| Polyunsaturated fatty acids (% energy intake)*          | 6-10           | <6 or >10  | Polyunsaturated fatty acids (% energy intake)          | 6 <sub>b</sub> -10  | <6 or >10  |
| Protein (% energy intake)                               | 10-15          | <10 or >15 | Protein (% energy intake)                              | 9 <sub>c</sub> -15  | <9 or >15  |
| Total carbohydrate (% energy intake)*                   | 50-70          | <50 or >70 | Total carbohydrate (% energy intake)                   | 50 <sub>a</sub> -70 | <50 or >70 |
| Dietary fiber (g)*                                      | 18-32          | <18 or >32 | Dietary fiber (g)                                      | 18 <sub>a</sub> -32 | <18 or >32 |
| Fruits and vegetables (g)                               | ≥400           | <400       | Fruits and vegetables (g)                              | ≥400 <sub>e</sub>   | <400       |
| Pulses and nuts (g)*                                    | ≥30            | <30        | Pulses (g)                                             | ≥30                 | <30        |
| Total non-milk extrinsic sugar (% total energy intake)* | 0-10           | >10        | Total non-milk extrinsic sugar (% total energy intake) | 0-5 <sub>d</sub>    | >5         |
| Cholesterol (mg)*                                       | 0-245          | >245       | Trans-fatty acids (% energy intake)                    | ≤2 <sub>e</sub>     | >2         |
| Fish (g)*                                               | ≥32            | <32        | Fish (g)                                               | ≥40 <sub>e</sub>    | <40        |

|                                           |      |      |                                          |                    |       |
|-------------------------------------------|------|------|------------------------------------------|--------------------|-------|
| Red meat and meat processed products (g)* | ≤90  | >90  | Oily fish (g)                            | ≥20 <sup>e</sup>   | <20   |
| Calcium (mg)*                             | ≥700 | <700 | Red meat and meat processed products (g) | ≤70 <sup>i</sup>   | >70   |
|                                           |      |      | Calcium (mg)                             | ≥700 <sup>c</sup>  | <700  |
|                                           |      |      | Sodium (mg)                              | ≤2400 <sup>c</sup> | >2400 |

\* Items based on advice on healthy eating as recommended by the UK Committee on Medical Aspects of Food Policy (COMA) [31]

*a* Based on NDNS Results from Years 7 and 8 (combined) of the Rolling Program (2014/2015 – 2015/2016) [29], UK Government Dietary Recommendations by Public Health England (2016) [32], Cardiovascular Disease Outcomes Strategy by UK Department of Health (2013) [33] and Draft report: Saturated fats and health by Scientific Advisory Committee on Nutrition (SACN) 2018 [35]

*b* Based on UK Government Dietary Recommendations by Public Health England (2016) [32]

*c* Based on UK Government Dietary Recommendations by Public Health England (2016) [32]

*d* Based on UK Government Dietary Recommendations by Public Health England (2016) [32] and Scientific Advisory Committee on Nutrition (SACN) Report 2015 on Carbohydrates and Health [36]

*e* Based on NDNS Results from Years 7 and 8 (combined) of the Rolling Program (2014/2015 – 2015/2016) [29] and The Eatwell Guide by Public Health England (2016) [34]
